# Supplementary material for: Synthesis of borophene on quartz towards hydroelectric generators
Source: Royal Society of Chemistry journal article supplement (doi:10.1039/d1ta10855g), 2022-01-01
Supplement: d1ta10855g1.pdf [file d1ta10855g1.pdf]

Electronic Supplementary Material (ESI) for Journal of Materials Chemistry A.  
This journal is © The Royal Society of Chemistry 2022

## **Supplementary Information**

### **Synthesis of borophene on quartz toward hydroelectric generator†**

Zenghui Wu, Guoan Tai,\* Runsheng Liu, Wei Shao, Chuang Hou and Xinchao Liang

The State Key Laboratory of Mechanics and Control of Mechanical Structures, Key Laboratory for Intelligent Nano Materials and Devices of Ministry of Education, College of Aerospace Engineering, Nanjing University of Aeronautics and Astronautics, Nanjing 210016, China

\*E-mail: taiguohan@nuaa.edu.cn

**This file includes:**

**Figure S1.** XPS spectra of the borophene film transferred on SiO<sub>2</sub>/Si substrates.

**Figure S2.** Optical images of the borophene films on quartz substrates prepared at different temperatures and durations.

**Figure S3.** High-resolution XPS spectra of B<sub>1s</sub> of the borophene films prepared at different temperatures for 30 min.

**Figure S4.** Optical images of the borophene samples transferred on SiO<sub>2</sub>/Si substrates.

**Figure S5.** Optical images of the borophene films prepared at 650 °C for different durations.

**Figure S6.** Dependence of induced voltage of the BHEG on the salt solutions.

**Figure S7.** Contact angle images of the samples.

**Figure S8.** Zeta potential of borophene glass at different pH values.

**Table S1.** Comparison of the elemental content of the borophene film on quartz and the film transferred on SiO<sub>2</sub>/Si substrate.

**Table S2.** Comparison of performance of the BHEG device with previously reported carbon-based HEG.

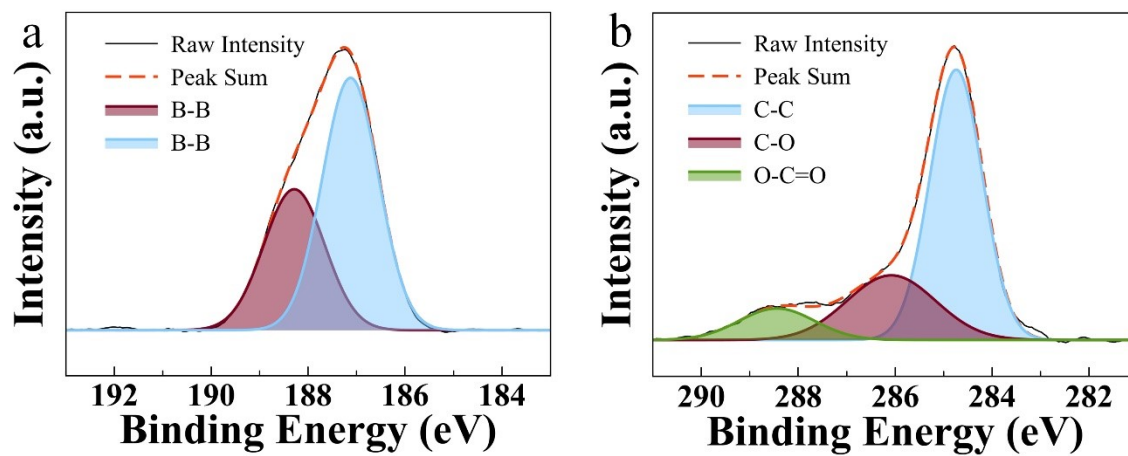

**Figure S1.** XPS spectra of the borophene film transferred on SiO<sub>2</sub>/Si substrates. (a) High-resolution XPS spectra of B<sub>1s</sub>. (b) High-resolution XPS spectra of C<sub>1s</sub>.

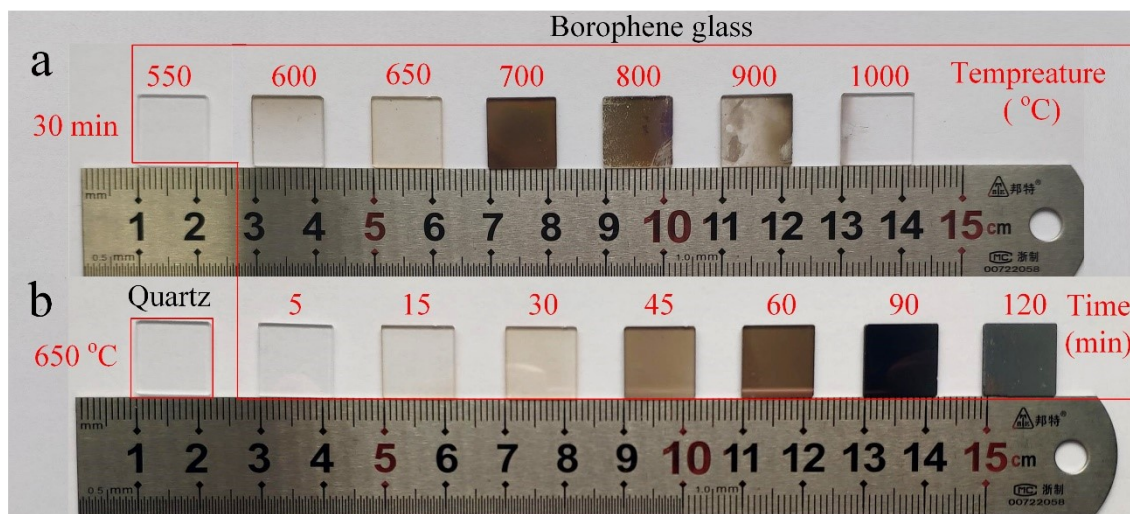

**Figure S2.** Optical images of the borophene films on quartz substrates prepared at different temperatures and durations. (a) Reaction temperatures varied from 550 to 1000 °C for 30 min. (b) Reaction durations varied from 5 to 120 min at 650 °C.

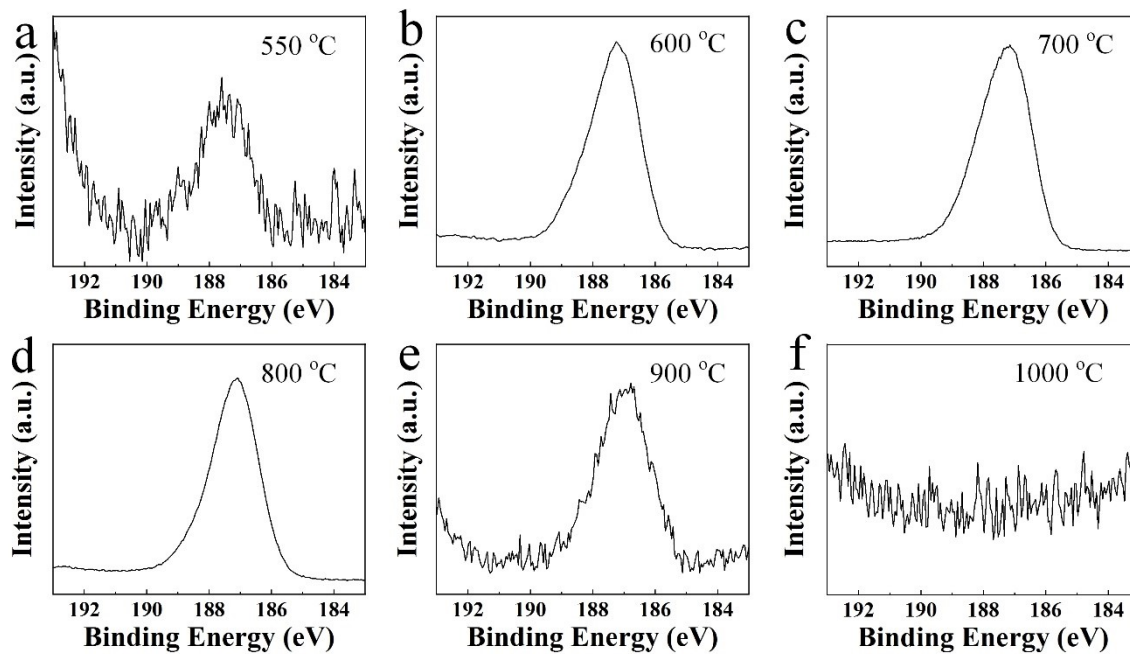

**Figure S3.** High-resolution XPS spectra of  $B_{1s}$  of the borophene films prepared at different temperatures for 30 min: (a) 550, (b) 600, (c) 700, (d) 800, (e) 900 and (f) 1000 °C.

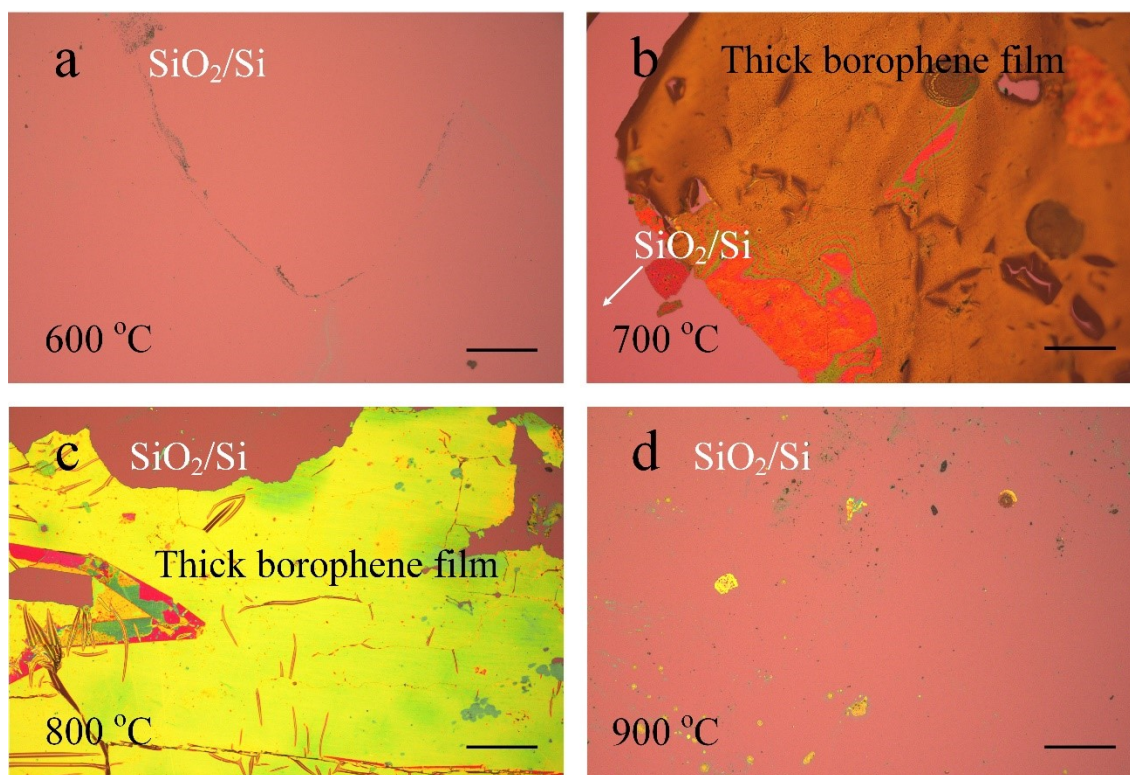

**Figure S4.** Optical images of the borophene samples transferred on SiO<sub>2</sub>/Si substrates. (a-d) Samples prepared at (a) 600, (b) 700, (c) 800, and (d) 900 °C. The reaction duration is kept for 30 min and the scale bar is 50 μm.



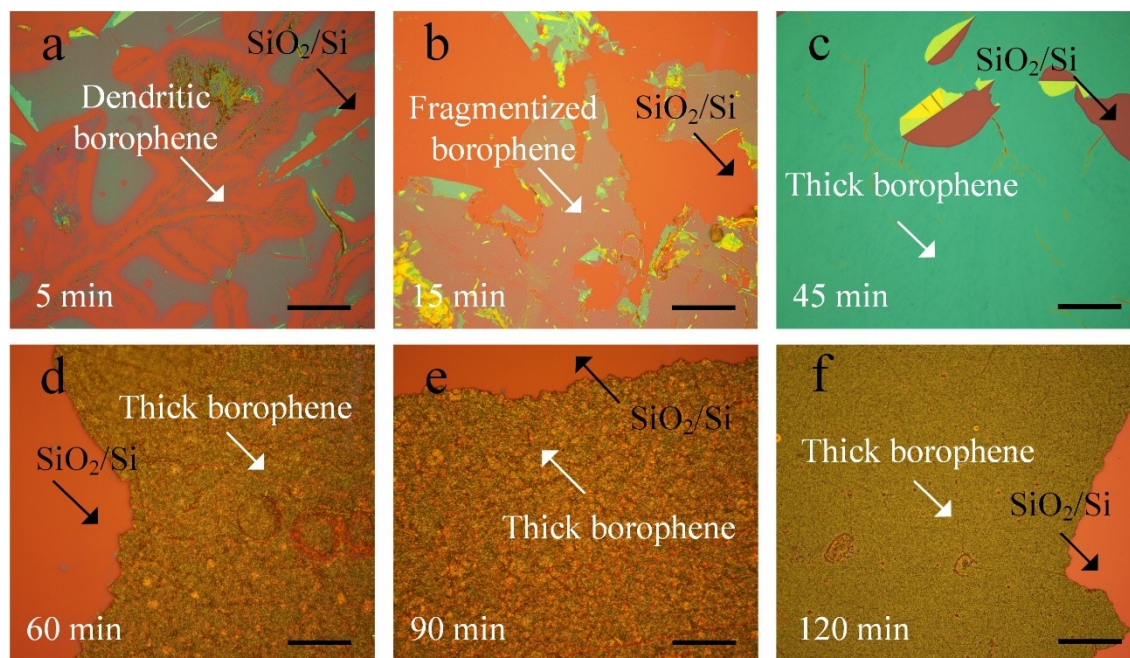

**Figure S5.** Optical images of the borophene films prepared at 650 °C for different durations: (a) 5, (b) 15, (c) 45, (d) 60, (e) 90 and (f) 120 min. The scale bar is 50  $\mu\text{m}$ .

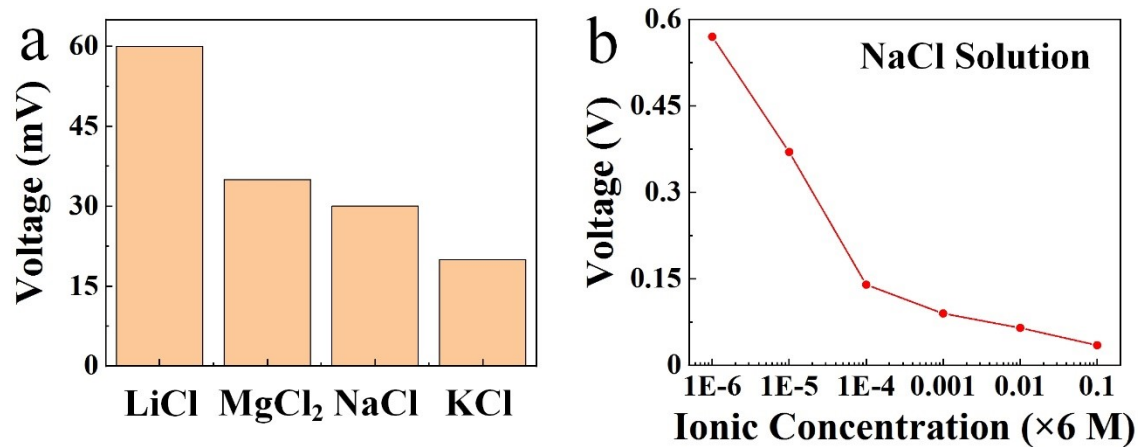

**Figure S6.** Dependence of induced voltage of the BHEG on the salt solutions. (a) Different ionic strength under the same concentration of 0.6 M. (b) Different concentrations. The flow velocity is 5 mL/s and the incident angle is 60°.



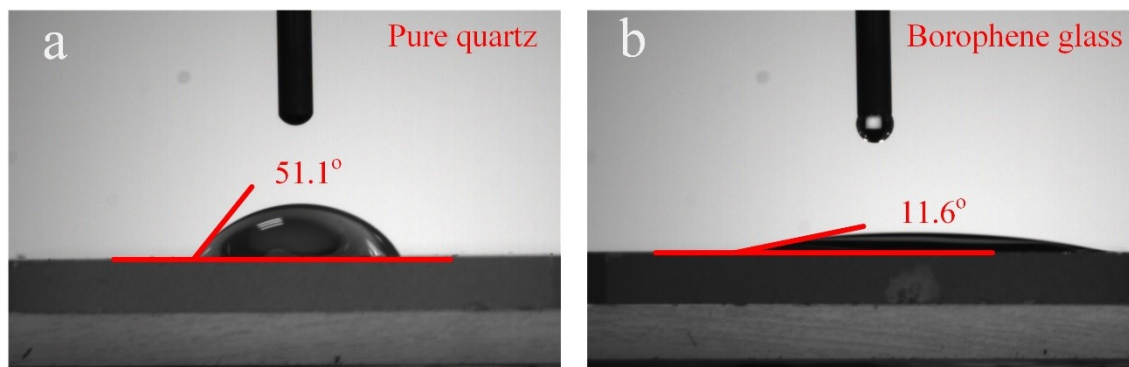

**Figure S7.** Contact angle images of the samples. (a, b) Original and borophene-covered quartz substrates.

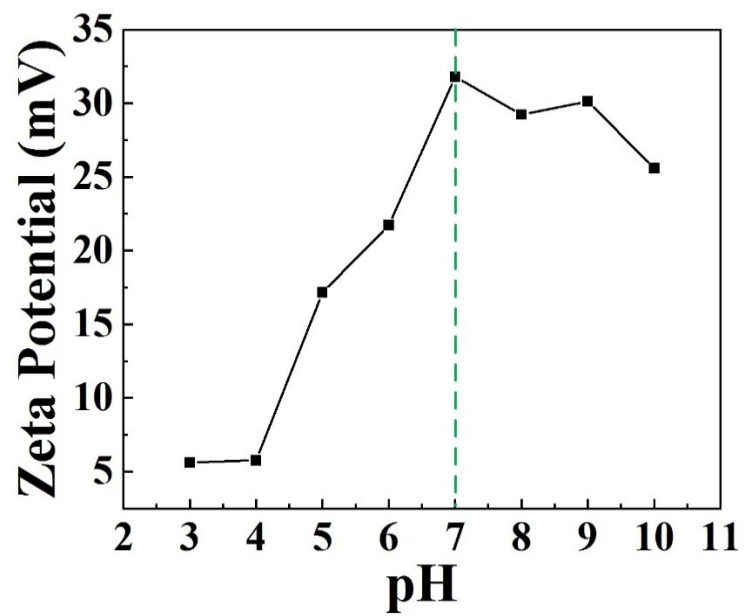

Figure S8. Zeta potential of borophene glass at different pH values.

**Table S1.** Comparison of elemental content of the borophene film on quartz and the film transferred on SiO<sub>2</sub>/Si substrate.

| Element  | Borophene on quartz<br>(At%) | Borophene on SiO <sub>2</sub> /Si<br>(At%) |
|----------|------------------------------|--------------------------------------------|
| <b>B</b> | <b>74.93</b>                 | <b>59.67</b>                               |
| C        | 11.91                        | 14.27                                      |
| O        | 8.23                         | 18.83                                      |
| Na       | 4.46                         | 0.76                                       |
| Si       | 0.11                         | 5.22                                       |

**Table S2.** Comparison of performance of the BHEG device with previously reported carbon-based HEG

| Materials                  | Method            | Substrate            | Liquid   | Potential [mV] | Current [nA] | Ref.      |
|----------------------------|-------------------|----------------------|----------|----------------|--------------|-----------|
| Wrinkled graphene          | CVD               | SiO <sub>2</sub> /Si | NaCl     | 37.6           | 78.4         | [23]      |
|                            |                   |                      | UPW      | 0              | 0            |           |
| Graphene                   | CVD               | Glass                | DI Water | 80             | --           | [24]      |
| Graphene grids             | CVD               | PDMS                 | NaCl     | 0.124          | --           | [25]      |
| Graphene hydrogel membrane | Vacuum filtration | --                   | NaCl     | -              | 2.23         | [26]      |
| SWCNT                      | Electric-arc      | --                   | HCl      | 5.3            | --           | [27]      |
|                            |                   |                      | Water    | 2.2            | --           |           |
| Aligned MWCNT sheet        | --                | Polymer fiber        | NaCl     | 151            | --           | [28]      |
| MWCNT                      | CVD               | Quartz               | NaCl     | 30             | --           | [29]      |
| SWCNTs                     | Vacuum filtration | Glass                | KCl      | 0.037          | --           | [30]      |
|                            |                   |                      | DI Water | 0.007          | --           |           |
| $\alpha'$ -2H-borophene    | CVD               | Quartz               | NaCl     | 30             | --           | This work |
|                            |                   |                      | UPW      | 4000           | 14           |           |

Notes: --: not mentioned; UPW: ultrapure water; Ref: references.
